# Supplementary material for: Histone H3 Lysine 27 Methylation Asymmetry on Developmentally-Regulated Promoters Distinguish the First Two Lineages in Mouse Preimplantation Embryos
Source: PLoS One. 2010 Feb 10;5(2):e9150. doi: 10.1371/journal.pone.0009150 (PMC2818844; doi:10.1371/journal.pone.0009150)
Supplement: Table S4 — GO terms enriched for expressed H3K4me3, H3K27me3 and H3K4/K27me3 promoter-containing genes in the ICM (Excel file). (0.03 MB XLS) [file pone.0009150.s008.xls]

## Sheet: K4m3-only
GO terms enriched for expressed H3K4me3, H3K27me3 and H3K4/K27me3 promoter-containing genes in the ICM:
H3K4me3-only genes
GO term summary
[GO:0006139] nucleobase, nucleoside, nucleotide and nucleic acid metabolic process
[GO:0008152] metabolic process
[GO:0009987] cellular process
[GO:0043170] macromolecule metabolic process
[GO:0009058] biosynthetic process
[GO:0050896] response to stimulus
[GO:0009056] catabolic process
[GO:0006810] transport
[GO:0006519] amino acid and derivative metabolic process
[GO:0007154] cell communication
[GO:0050789] regulation of biological process
[GO:0007275] multicellular organismal development
[GO:0008219] cell death
Pvalue	Count	Size	Term
1.06e-48	247	735	[GO:0006139] nucleobase, nucleoside, nucleotide and nucleic acid metabolic process
4.71e-45	673	3340	[GO:0008152] metabolic process
2.7e-30	684	3462	[GO:0043283] biopolymer metabolic process
1.51e-24	82	185	[GO:0006412] translation
1.24e-17	74	193	[GO:0006397] mRNA processing
3.01e-15	49	112	[GO:0006396] RNA processing
2.76e-14	57	146	[GO:0008380] RNA splicing
3.8e-14	56	143	[GO:0006281] DNA repair
7.82e-13	45	107	[GO:0006457] protein folding
1.55e-12	154	643	[GO:0008104] protein localization
3.02e-12	68	209	[GO:0000279] M phase
4e-12	31	60	[GO:0006364] rRNA processing
6.37e-12	361	1911	[GO:0019538] protein metabolic process
1.22e-11	87	305	[GO:0022402] cell cycle process
1.71e-11	80	295	[GO:0009059] macromolecule biosynthetic process
1.77e-11	54	153	[GO:0007067] mitosis
8.07e-11	66	213	[GO:0000278] mitotic cell cycle
1.01e-10	383	2086	[GO:0044260] cellular macromolecule metabolic process
1.08e-10	67	219	[GO:0051301] cell division
2.77e-08	42	127	[GO:0006260] DNA replication
1.38e-07	127	589	[GO:0051649] establishment of localization in cell
2.07e-07	13	20	[GO:0006099] tricarboxylic acid cycle
1.1e-06	70	287	[GO:0034621] cellular macromolecular complex subunit organization
1.49e-06	14	26	[GO:0042254] ribosome biogenesis
1.78e-06	14	26	[GO:0006914] autophagy
1.78e-06	14	26	[GO:0009109] coenzyme catabolic process
3.23e-06	14	27	[GO:0006084] acetyl-CoA metabolic process
5.64e-06	14	28	[GO:0045333] cellular respiration
6.66e-06	68	297	[GO:0015031] protein transport
1.29e-05	34	118	[GO:0006886] intracellular protein transport
1.37e-05	17	41	[GO:0006418] tRNA aminoacylation for protein translation
1.37e-05	17	41	[GO:0043038] amino acid activation
1.71e-05	33	113	[GO:0006605] protein targeting
2.01e-05	10	17	[GO:0006888] ER to Golgi vesicle-mediated transport
2.64e-05	16	39	[GO:0006399] tRNA metabolic process
2.67e-05	12	24	[GO:0000375] RNA splicing, via transesterification reactions
2.67e-05	12	24	[GO:0000398] nuclear mRNA splicing, via spliceosome
3.93e-05	18	48	[GO:0008033] tRNA processing
4.03e-05	8	12	[GO:0042773] ATP synthesis coupled electron transport
5.12e-05	96	488	[GO:0006996] organelle organization and biogenesis
5.82e-05	14	33	[GO:0009142] nucleoside triphosphate biosynthetic process
8.09e-05	7	10	[GO:0000045] autophagic vacuole formation
8.09e-05	7	10	[GO:0006298] mismatch repair
9.35e-05	32	117	[GO:0051603] proteolysis involved in cellular protein catabolic process
0.000107	291	1727	[GO:0006350] transcription
0.000121	33	124	[GO:0006091] generation of precursor metabolites and energy
0.000123	13	31	[GO:0009206] purine ribonucleoside triphosphate biosynthetic process
0.000147	17	48	[GO:0050657] nucleic acid transport
0.000147	17	48	[GO:0051236] establishment of RNA localization
0.00017	300	1798	[GO:0010468] regulation of gene expression
0.000183	8	14	[GO:0048193] Golgi vesicle transport
0.000197	63	292	[GO:0065003] macromolecular complex assembly
0.000247	11	25	[GO:0006402] mRNA catabolic process
0.000262	13	33	[GO:0006413] translational initiation
0.000274	5	6	[GO:0006303] double-strand break repair via nonhomologous end joining
0.000319	30	114	[GO:0043632] modification-dependent macromolecule catabolic process
0.000372	4	4	[GO:0042159] lipoprotein catabolic process
0.000382	10	23	[GO:0033036] macromolecule localization
0.000384	16	47	[GO:0006164] purine nucleotide biosynthetic process
0.000454	29	111	[GO:0006511] ubiquitin-dependent protein catabolic process
0.000623	8	16	[GO:0015986] ATP synthesis coupled proton transport
0.000705	13	36	[GO:0009199] ribonucleoside triphosphate metabolic process
0.000714	99	524	[GO:0009056] catabolic process
0.000798	62	301	[GO:0051276] chromosome organization and biogenesis
0.000835	16	50	[GO:0009150] purine ribonucleotide metabolic process
0.000843	282	1719	[GO:0019219] regulation of nucleobase, nucleoside, nucleotide and nucleic acid metabolic process
0.000849	5	7	[GO:0006268] DNA unwinding during replication
0.000849	5	7	[GO:0032392] DNA geometric change
0.000905	17	55	[GO:0065002] intracellular protein transport across a membrane
0.000967	15	46	[GO:0009260] ribonucleotide biosynthetic process
0.000967	15	46	[GO:0051028] mRNA transport
0.00103	8	17	[GO:0034220] transmembrane ion transport
0.00115	9	21	[GO:0009267] cellular response to starvation
0.00115	9	21	[GO:0022900] electron transport chain
0.00124	15	47	[GO:0007059] chromosome segregation
0.00139	7	14	[GO:0000184] nuclear-transcribed mRNA catabolic process, nonsense-mediated decay
0.00153	35	152	[GO:0007017] microtubule-based process
0.00156	11	30	[GO:0031668] cellular response to extracellular stimulus
0.00157	38	169	[GO:0030163] protein catabolic process
0.00166	13	39	[GO:0009144] purine nucleoside triphosphate metabolic process
0.00166	33	146	[GO:0007049] cell cycle
0.00167	10	26	[GO:0046034] ATP metabolic process
0.00179	20	73	[GO:0051321] meiotic cell cycle
0.00181	265	1626	[GO:0032774] RNA biosynthetic process
0.002	5	8	[GO:0016446] somatic hypermutation of immunoglobulin genes
0.0021	40	183	[GO:0051726] regulation of cell cycle
0.00211	19	69	[GO:0006310] DNA recombination
0.00229	7	15	[GO:0007051] spindle organization and biogenesis
0.00234	14	45	[GO:0045454] cell redox homeostasis
0.00248	15	50	[GO:0009108] coenzyme biosynthetic process
0.00255	261	1609	[GO:0006355] regulation of transcription, DNA-dependent
0.00269	23	91	[GO:0051169] nuclear transport
0.00312	6	12	[GO:0006783] heme biosynthetic process
0.00331	27	114	[GO:0065004] protein-DNA complex assembly
0.00348	13	42	[GO:0006497] protein amino acid lipidation
0.00364	19	72	[GO:0007126] meiosis
0.00391	273	1711	[GO:0010556] regulation of macromolecule biosynthetic process
0.00409	321	2031	[GO:0019222] regulation of metabolic process
0.00442	4	6	[GO:0018279] protein amino acid N-linked glycosylation via asparagine
0.00442	4	6	[GO:0045910] negative regulation of DNA recombination
0.00495	6	13	[GO:0022618] ribonucleoprotein complex assembly
0.00511	6	13	[GO:0007034] vacuolar transport
0.00518	8	21	[GO:0051168] nuclear export
0.00538	7	17	[GO:0007031] peroxisome organization and biogenesis
0.00607	22	92	[GO:0044265] cellular macromolecule catabolic process
0.00637	17	65	[GO:0006417] regulation of translation
0.00708	5	10	[GO:0006367] transcription initiation from RNA polymerase II promoter
0.00708	5	10	[GO:0010165] response to X-ray
0.00716	8	22	[GO:0006289] nucleotide-excision repair
0.00719	18	71	[GO:0006916] anti-apoptosis
0.00772	6	14	[GO:0051188] cofactor biosynthetic process
0.00791	6	14	[GO:0007040] lysosome organization and biogenesis
0.00791	6	14	[GO:0033014] tetrapyrrole biosynthetic process
0.00842	9	27	[GO:0009411] response to UV
0.00878	17	67	[GO:0017038] protein import
0.00917	4	7	[GO:0031575] G1/S transition checkpoint
0.00923	10	32	[GO:0051640] organelle localization
0.00956	14	52	[GO:0042157] lipoprotein metabolic process
0.00961	3	4	[GO:0000080] G1 phase of mitotic cell cycle
0.00961	3	4	[GO:0006047] UDP-N-acetylglucosamine metabolic process
0.00961	3	4	[GO:0006122] mitochondrial electron transport, ubiquinol to cytochrome c
0.00961	3	4	[GO:0006893] Golgi to plasma membrane transport
0.00961	3	4	[GO:0007044] cell-substrate junction assembly
0.00961	3	4	[GO:0015780] nucleotide-sugar transport
0.00961	3	4	[GO:0018208] peptidyl-proline modification
0.00961	3	4	[GO:0042255] ribosome assembly
0.00961	3	4	[GO:0042992] negative regulation of transcription factor import into nucleus
0.00978	1198	8945	[GO:0009987] cellular process

## Sheet: K27m3-only
GO terms enriched for expressed H3K4me3, H3K27me3 and H3K4/K27me3 promoter-containing genes in the ICM:
H3K27me3-only genes
GO term summary
[GO:0007154] cell communication
[GO:0009987] cellular process
[GO:0050789] regulation of biological process
[GO:0006139] nucleobase, nucleoside, nucleotide and nucleic acid metabolic process
[GO:0008152] metabolic process
[GO:0007275] multicellular organismal development
[GO:0030154] cell differentiation
[GO:0043170] macromolecule metabolic process
[GO:0009058] biosynthetic process
Pvalue	Count	Size	Term
0.00133	7	149	[GO:0051056] regulation of small GTPase mediated signal transduction
0.00206	20	898	[GO:0007242] intracellular signaling cascade
0.00246	2	7	[GO:0031122] cytoplasmic microtubule organization and biogenesis
0.00416	2	9	[GO:0009220] pyrimidine ribonucleotide biosynthetic process
0.00476	3	31	[GO:0045445] myoblast differentiation
0.00517	2	10	[GO:0009112] nucleobase metabolic process
0.0062	10	356	[GO:0010628] positive regulation of gene expression
0.00876	2	13	[GO:0030166] proteoglycan biosynthetic process
0.00924	6	162	[GO:0007265] Ras protein signal transduction

## Sheet: Co-enriched
GO terms enriched for expressed H3K4me3, H3K27me3 and H3K4/K27me3 promoter-containing genes in the ICM:
H3K4/27me3 genes
GO term summary
[GO:0008152] metabolic process
[GO:0009987] cellular process
[GO:0006139] nucleobase, nucleoside, nucleotide and nucleic acid metabolic process
[GO:0009058] biosynthetic process
[GO:0043170] macromolecule metabolic process
Pvalue	Count	Size	Term
0.000297	84	5840	[GO:0008152] metabolic process
0.001681	4	47	[GO:0007059] chromosome segregation
0.002655	6	127	[GO:0006260] DNA replication
0.004046	2	9	[GO:0001522] pseudouridine synthesis
0.005815	40	2504	[GO:0006139] nucleobase, nucleoside, nucleotide and nucleic acid metabolic process
0.00628	5	107	[GO:0034470] ncRNA processing
